# Supplementary material for: Brief communication: Preliminary ICESat-2 (Ice, Cloud and land Elevation Satellite-2) measurements of outlet glaciers reveal heterogeneous patterns of seasonal dynamic thickness change
Source: Copernicus journal article supplement (doi:10.5194/tc-16-1341-2022), 2022-04-12
Supplement: Supplementary file 1 [file tc-16-1341-2022-supplement.zip]

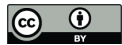

## *Supplement of*

# **Brief communication: Preliminary ICESat-2 (Ice, Cloud and land Elevation Satellite-2) measurements of outlet glaciers reveal heterogeneous patterns of seasonal dynamic thickness change**

**Christian J. Taubenberger et al.**

*Correspondence to:* Christian J. Taubenberger (ctaubenberger@gmail.com)

- tc-16-1341-2022-supplement-title-page.pdf
- Taubenberger et al 2022 - Supplementary Dynamic Seasonal Thickness Change Plots REVISED.pdf
- Taubenberger et al 2022 - Supplementary GrIS Outlet Glaciers Seasonal Thickness Data Using ArcticDEM.xlsx
- Taubenberger et al 2022 Supplementary Shapefile.cpg
- Taubenberger et al 2022 Supplementary Shapefile.dbf
- Taubenberger et al 2022 Supplementary Shapefile.prj
- Taubenberger et al 2022 Supplementary Shapefile.shp
- Taubenberger et al 2022 Supplementary Shapefile.shx

The copyright of individual parts of the supplement might differ from the article licence.
